# Supplementary material for: Intriguing strain-governed magnetic phase transitions in 2D vanadium porphyrin sheets
Source: Royal Society of Chemistry journal article supplement (doi:10.1039/d1cp04597k), 2022-01-01
Supplement: d1cp04597k1.pdf [file d1cp04597k1.pdf]

## **Intriguing Strain-Governed Magnetic Phase Transitions in 2D Vanadium Porphyrin Sheet**

Qi Wang, Zhilu Zhang, Haicai Huang, Xinyu Song\*, Yuxiang Bu

*School of Chemistry and Chemical Engineering, Shandong University, Jinan 250100, People's  
Republic of China*

### **Supporting Information**

#### **Content**

- 1. All Calculated Data**
- 2. Four Magnetic Configurations**
- 3. AIMD Simulation of the V-PP4 Sheet**
- 4. Strain energy of four magnetic configurations**
- 5. The Magnetic Moment of V, N and C Atom in the Different Biaxial Strain**
- 6. Net effective charges on N and V atoms form Bader charge analysis**

## 1. All Calculated Data

**Table S1.** The bond lengths and lattice constants (a/b) in different biaxial strains for the vanadium porphyrin sheet (V-PP4)

| Biaxial strain | V-V (Å) | V-N (Å) | a/b (Å) |
|----------------|---------|---------|---------|
| -0.08          | 7.732   | 1.789   | 15.460  |
| -0.07          | 7.814   | 1.816   | 15.629  |
| -0.06          | 7.898   | 1.843   | 15.797  |
| -0.05          | 7.982   | 1.871   | 15.964  |
| -0.04          | 8.066   | 1.899   | 16.133  |
| -0.02          | 8.234   | 1.957   | 16.469  |
| 0              | 8.402   | 2.018   | 16.805  |
| 0.02           | 8.570   | 2.084   | 17.141  |
| 0.04           | 8.739   | 2.155   | 17.477  |
| 0.05           | 8.822   | 2.190   | 17.644  |
| 0.06           | 8.907   | 2.230   | 17.813  |
| 0.07           | 8.990   | 2.270   | 17.980  |
| 0.08           | 9.075   | 2.312   | 18.149  |

**Table S2.** The energies (FM/AFM1/AFM2/FIM) in different biaxial strains for the Vanadium porphyrin sheet (V-PP4)

| Biaxial strain | FM (eV)  | AFM1 (eV) | AFM2 (eV) | FIM (eV) |
|----------------|----------|-----------|-----------|----------|
| -0.08          | -856.388 | -856.617  | -856.326  | -856.543 |
| -0.07          | -869.236 | -869.365  | -869.146  | -869.342 |
| -0.06          | -879.913 | -879.961  | -879.796  | -879.964 |
| -0.05          | -888.572 | -888.555  | -888.433  | -888.583 |
| -0.04          | -895.360 | -895.292  | -895.205  | -895.329 |
| -0.02          | -903.881 | -903.744  | -903.720  | -903.792 |
| 0              | -906.457 | -906.288  | -906.318  | -906.343 |
| 0.02           | -904.102 | -903.927  | -904.010  | -903.986 |
| 0.04           | -897.593 | -897.428  | -897.557  | -897.491 |
| 0.05           | -892.981 | -892.827  | -892.975  | -892.886 |
| 0.06           | -887.643 | -887.497  | -887.667  | -887.562 |
| 0.07           | -881.637 | -881.497  | -881.687  | -881.558 |
| 0.08           | -875.018 | -874.882  | -875.093  | -874.945 |

**Table S3.** The relative energies (FM/AFM1/AFM2/FIM) to its corresponding most stable structure (strain=0) in different biaxial strains for the vanadium porphyrin sheet (V-PP4)

| <b>Biaxial strain</b> | <b>FM(eV)</b> | <b>AFM1 (eV)</b> | <b>AFM2 (eV)</b> | <b>FIM (eV)</b> |
|-----------------------|---------------|------------------|------------------|-----------------|
| -0.08                 | 50.069        | 49.991           | 49.990           | 49.799          |
| -0.07                 | 37.221        | 36.922           | 37.172           | 37.000          |
| -0.06                 | 26.544        | 26.327           | 26.521           | 26.378          |
| -0.05                 | 17.885        | 17.732           | 17.885           | 17.759          |
| -0.04                 | 11.097        | 10.996           | 11.113           | 11.014          |
| -0.02                 | 2.576         | 2.544            | 2.598            | 2.550           |
| 0.00                  | 0.000         | 0.000            | 0.000            | 0.000           |
| 0.02                  | 2.355         | 2.361            | 2.307            | 2.356           |
| 0.04                  | 8.864         | 8.859            | 8.760            | 8.851           |
| 0.05                  | 13.476        | 13.460           | 13.343           | 13.456          |
| 0.06                  | 18.814        | 18.791           | 18.650           | 18.781          |
| 0.07                  | 24.820        | 24.790           | 24.630           | 24.784          |
| 0.08                  | 31.439        | 31.405           | 31.225           | 31.397          |

**Table S4.** The exchange energies ( $E_{ex}$ ) in different biaxial strains for the vanadium porphyrin sheet (V-PP4)

| <b>Biaxial strain</b> | <b><math>E_{ex1}/eV</math><br/>(=<math>E_{AFM1}-E_{FM}</math>)</b> | <b><math>E_{ex2}/eV</math><br/>(=<math>E_{AFM2}-E_{FM}</math>)</b> | <b><math>E_{ex3}/eV</math><br/>(=<math>E_{FIM}-E_{FM}</math>)</b> |
|-----------------------|--------------------------------------------------------------------|--------------------------------------------------------------------|-------------------------------------------------------------------|
| -0.08                 | -0.229                                                             | 0.061                                                              | -0.155                                                            |
| -0.07                 | -0.129                                                             | 0.090                                                              | -0.106                                                            |
| -0.06                 | -0.048                                                             | 0.116                                                              | -0.051                                                            |
| -0.05                 | 0.016                                                              | 0.139                                                              | -0.011                                                            |
| -0.04                 | 0.068                                                              | 0.155                                                              | 0.031                                                             |
| -0.02                 | 0.137                                                              | 0.161                                                              | 0.089                                                             |
| 0.00                  | 0.169                                                              | 0.139                                                              | 0.114                                                             |
| 0.02                  | 0.174                                                              | 0.091                                                              | 0.115                                                             |
| 0.04                  | 0.164                                                              | 0.035                                                              | 0.101                                                             |
| 0.05                  | 0.153                                                              | 0.006                                                              | 0.095                                                             |
| 0.06                  | 0.146                                                              | -0.023                                                             | 0.081                                                             |
| 0.07                  | 0.139                                                              | -0.050                                                             | 0.078                                                             |
| 0.08                  | 0.135                                                              | -0.074                                                             | 0.072                                                             |

**Table S5.** The energies (FM/AFM1/AFM2/FIM) in different biaxial strains for the Vanadium porphyrin sheet (V-PP4), obtained by single point calculations using the optimized structure at the DFT-D3 level

| <b>Biaxial strain</b> | <b>FM (eV)</b>  | <b>AFM1 (eV)</b> | <b>AFM2 (eV)</b> | <b>FIM (eV)</b> |
|-----------------------|-----------------|------------------|------------------|-----------------|
| -0.08                 | -858.015        | <b>-858.248</b>  | -857.954         | -858.172        |
| -0.06                 | -881.679        | <b>-881.732</b>  | -881.565         | -881.345        |
| -0.04                 | <b>-897.330</b> | -897.267         | -897.177         | -896.774        |
| -0.02                 | <b>-906.048</b> | -905.913         | -905.887         | -905.961        |
| 0.00                  | <b>-908.800</b> | -906.578         | -906.605         | -907.949        |
| 0.02                  | <b>-906.561</b> | -906.390         | -906.472         | -905.857        |
| 0.04                  | <b>-900.075</b> | -899.915         | -900.044         | -899.310        |
| 0.06                  | -890.081        | -889.939         | <b>-890.110</b>  | -890.003        |
| 0.08                  | -877.371        | -877.238         | <b>-877.450</b>  | -877.300        |

**Table S6.** The exchange energies ( $E_{ex}$ ) in different biaxial strains for the vanadium porphyrin sheet (V-PP4), obtained by single point calculations using the optimized structure at the DFT-D3 level

| <b>Biaxial strain</b> | <b><math>E_{ex1}/eV</math><br/>(=<math>E_{AFM1}-E_{FM}</math>)</b> | <b><math>E_{ex2}/eV</math><br/>(=<math>E_{AFM2}-E_{FM}</math>)</b> | <b><math>E_{ex3}/eV</math><br/>(=<math>E_{FIM}-E_{FM}</math>)</b> |
|-----------------------|--------------------------------------------------------------------|--------------------------------------------------------------------|-------------------------------------------------------------------|
| -0.08                 | <b>-0.232</b>                                                      | 0.060                                                              | -0.157                                                            |
| -0.06                 | <b>-0.053</b>                                                      | 0.114                                                              | 0.333                                                             |
| -0.04                 | 0.063                                                              | 0.153                                                              | 0.556                                                             |
| -0.02                 | 0.134                                                              | 0.161                                                              | 0.086                                                             |
| 0.00                  | 2.221                                                              | 2.195                                                              | 0.850                                                             |
| 0.02                  | 0.170                                                              | 0.088                                                              | 0.704                                                             |
| 0.04                  | 0.160                                                              | 0.031                                                              | 0.765                                                             |
| 0.06                  | 0.141                                                              | <b>-0.029</b>                                                      | 0.077                                                             |
| 0.08                  | 0.132                                                              | <b>-0.079</b>                                                      | 0.070                                                             |

**Table S7.** The energies (FM/AFM1/AFM2/FIM) in different uniaxial strains (at the direction  $a$ ) for the vanadium porphyrin sheet (V-PP4)

| Uniaxial strain( $a$ ) | FM (eV)  | AFM1 (eV) | AFM2 (eV) | FIM (eV) |
|------------------------|----------|-----------|-----------|----------|
| -0.08                  | -888.912 | -888.945  | -888.863  | -888.940 |
| -0.06                  | -896.868 | -896.793  | -896.771  | -896.838 |
| -0.04                  | -902.322 | -902.186  | -902.191  | -902.249 |
| -0.02                  | -905.454 | -905.294  | -905.309  | -905.352 |
| 0                      | -906.458 | -906.289  | -906.318  | -906.343 |
| 0.02                   | -905.522 | -905.342  | -905.342  | -905.405 |
| 0.04                   | -902.853 | -902.669  | -902.759  | -902.744 |
| 0.06                   | -898.624 | -898.466  | -898.584  | -898.537 |
| 0.08                   | -893.067 | -892.945  | -893.084  | -892.347 |

**Table S8.** The exchange energies ( $E_{ex}$ ) in different uniaxial strains (at the direction  $a$ ) for the vanadium porphyrin sheet (V-PP4)

| Uniaxial strain( $a$ ) | $E_{ex1}/eV$<br>(= $E_{AFM1}-E_{FM}$ ) | $E_{ex2}/eV$<br>(= $E_{AFM2}-E_{FM}$ ) | $E_{ex3}/eV$<br>(= $E_{FIM}-E_{FM}$ ) |
|------------------------|----------------------------------------|----------------------------------------|---------------------------------------|
| -0.08                  | -0.033                                 | 0.049                                  | -0.027                                |
| -0.06                  | 0.074                                  | 0.096                                  | 0.029                                 |
| -0.04                  | 0.136                                  | 0.131                                  | 0.073                                 |
| -0.02                  | 0.159                                  | 0.144                                  | 0.101                                 |
| 0                      | 0.169                                  | 0.139                                  | 0.114                                 |
| 0.02                   | 0.180                                  | 0.180                                  | 0.116                                 |
| 0.04                   | 0.183                                  | 0.093                                  | 0.108                                 |
| 0.06                   | 0.157                                  | 0.039                                  | 0.086                                 |
| 0.08                   | 0.121                                  | -0.016                                 | 0.719                                 |

**Table S9.** The Magnetic Moments of V atom, N atom and Total Magnetic Moments of FM in Vanadium Porphyrin Sheet (V-PP4) in Different Biaxial Strains

| <b>Biaxial strain</b> | Magnetic Moment (V) | Magnetic Moment (N) | Magnetic Moment (FM/V-PP4) |
|-----------------------|---------------------|---------------------|----------------------------|
| -0.08                 | 1.458               | -0.037              | 5.391                      |
| -0.07                 | 1.600               | -0.040              | 6.048                      |
| -0.06                 | 1.707               | -0.043              | 6.533                      |
| -0.05                 | 1.804               | -0.045              | 6.972                      |
| -0.04                 | 1.894               | -0.047              | 7.373                      |
| -0.02                 | 2.043               | -0.051              | 7.991                      |
| 0                     | 2.183               | -0.055              | 8.533                      |
| 0.02                  | 2.316               | -0.058              | 9.047                      |
| 0.04                  | 2.441               | -0.060              | 9.501                      |
| 0.05                  | 2.499               | -0.061              | 9.685                      |
| 0.06                  | 2.561               | -0.060              | 9.879                      |
| 0.07                  | 2.620               | -0.057              | 10.043                     |
| 0.08                  | 2.672               | -0.054              | 10.180                     |

**Table S10.** The bond lengths in different biaxial strains for the Vanadium porphyrin sheet (V-PP2)

| <b>Biaxial strain</b> | <b>V-V (Å)</b> | <b>V-N (Å)</b> |
|-----------------------|----------------|----------------|
| -0.08                 | 7.730          | 1.789          |
| -0.06                 | 7.898          | 1.843          |
| -0.04                 | 8.066          | 1.899          |
| -0.02                 | 8.234          | 1.957          |
| 0                     | 8.402          | 2.018          |
| 0.02                  | 8.570          | 2.084          |
| 0.04                  | 8.738          | 2.153          |
| 0.06                  | 8.906          | 2.227          |
| 0.08                  | 9.074          | 2.309          |

**Table S11.** The energies (FM/AFM1') and the exchange energies ( $E_{ex}=(E_{AFM}-E_{FM})/eV$ ) in different biaxial strains for the Vanadium porphyrin sheet (V-PP2)

| <b>Biaxial strain</b> | <b>FM (eV)</b> | <b>AFM1' (eV)</b> | <b><math>E_{ex1}/eV</math><br/>(=<math>E_{AFM1'}-E_{FM}</math>)</b> |
|-----------------------|----------------|-------------------|---------------------------------------------------------------------|
| -0.08                 | -428.220       | -428.306          | <b>-0.085</b>                                                       |
| -0.06                 | -439.976       | -439.987          | <b>-0.010</b>                                                       |
| -0.04                 | -447.676       | -447.634          | 0.041                                                               |
| -0.02                 | -451.930       | -451.848          | 0.081                                                               |
| 0.00                  | -453.240       | -453.139          | 0.100                                                               |
| 0.02                  | -452.059       | -451.959          | 0.099                                                               |
| 0.04                  | -448.801       | -448.711          | 0.090                                                               |
| 0.06                  | -443.833       | -443.755          | 0.078                                                               |
| 0.08                  | -437.503       | -437.441          | 0.062                                                               |

**Table S12.** The energies (FM/AFM2') and the exchange energies ( $E_{ex}=(E_{AFM}-E_{FM})/eV$ ) in different biaxial strains for the Vanadium porphyrin sheet (V-PP2)

| <b>Biaxial strain(a)</b> | <b>FM (eV)</b> | <b>AFM2' (eV)</b> | <b><math>E_{ex2}/eV</math><br/>(=<math>E_{AFM2'}-E_{FM}</math>)</b> |
|--------------------------|----------------|-------------------|---------------------------------------------------------------------|
| -0.08                    | -428.182       | -428.109          | 0.072                                                               |
| -0.06                    | -439.949       | -439.847          | 0.101                                                               |
| -0.04                    | -447.662       | -447.550          | 0.111                                                               |
| -0.02                    | -451.920       | -451.806          | 0.114                                                               |
| 0.00                     | -453.239       | -453.139          | 0.100                                                               |
| 0.02                     | -452.065       | -451.994          | 0.070                                                               |
| 0.04                     | -448.814       | -448.777          | 0.036                                                               |
| 0.06                     | -443.849       | -443.846          | 0.003                                                               |
| 0.08                     | -437.524       | -437.554          | <b>-0.029</b>                                                       |

**Table S13.** The Magnetic Moments of V atom and Total Magnetic Moments of V-PP2 in different biaxial strains

| Biaxial strain | Magnetic Moment (V) | Magnetic Moment (V-PP2) |
|----------------|---------------------|-------------------------|
| -0.08          | 1.449               | 2.682                   |
| -0.06          | 1.701               | 3.268                   |
| -0.04          | 1.908               | 3.754                   |
| -0.02          | 2.068               | 4.096                   |
| 0.00           | 2.189               | 4.299                   |
| 0.02           | 2.316               | 4.494                   |
| 0.04           | 2.441               | 4.718                   |
| 0.06           | 2.560               | 4.906                   |
| 0.08           | 2.669               | 5.064                   |



## 2. Four Magnetic Configurations

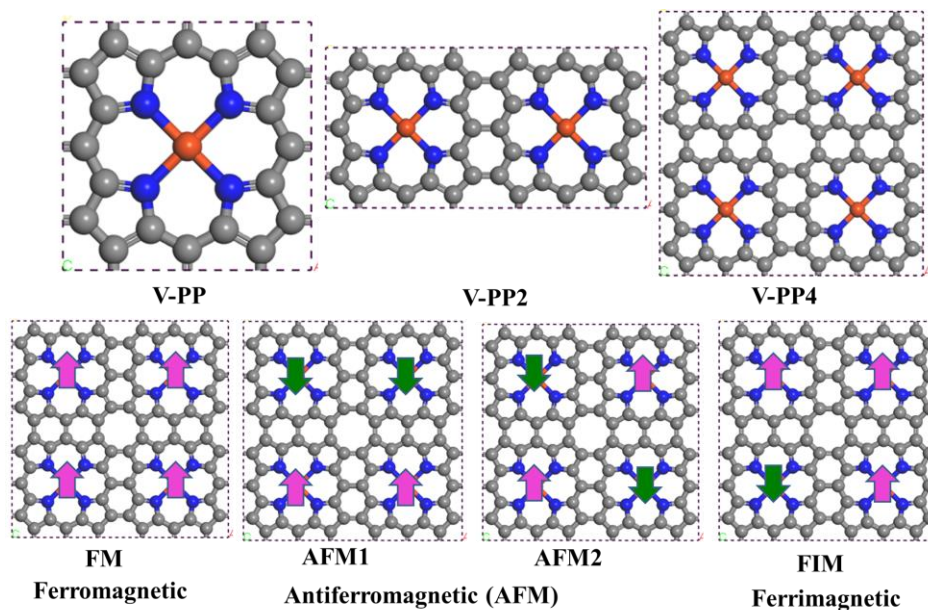

**Figure S1.** Two-dimensional vanadium porphyrin structure and magnetic configurations, where V-PP means a primitive unit cell and V-PP2 contains two primitive unit cell, and the  $2 \times 2$  supercell composed of four primitive unit cells are represented by V-PP4. Four magnetic configurations (ferromagnetic (FM), antiferromagnetic (AFM1 and AFM2) and ferromagnetic (FIM)) of vanadium porphyrin sheet, where the pink arrow denote spin up and the green arrow denote spin down. Red, gray and blue balls represent vanadium (V), carbon (C) and nitrogen (N) atoms, respectively.

### 3. AIMD Simulation of the V-PP4 Sheet

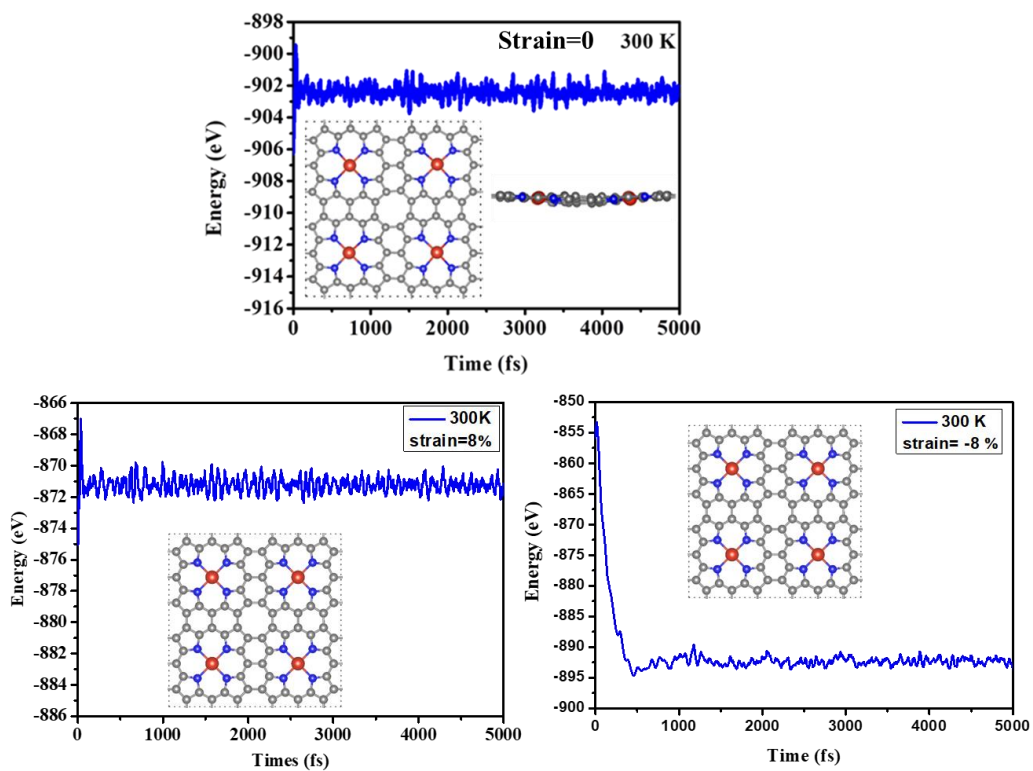

Figure S2. AIMD simulation of the  $2 \times 2$  VPP4 sheet.

#### 4. Strain Energies of Four Magnetic Configurations

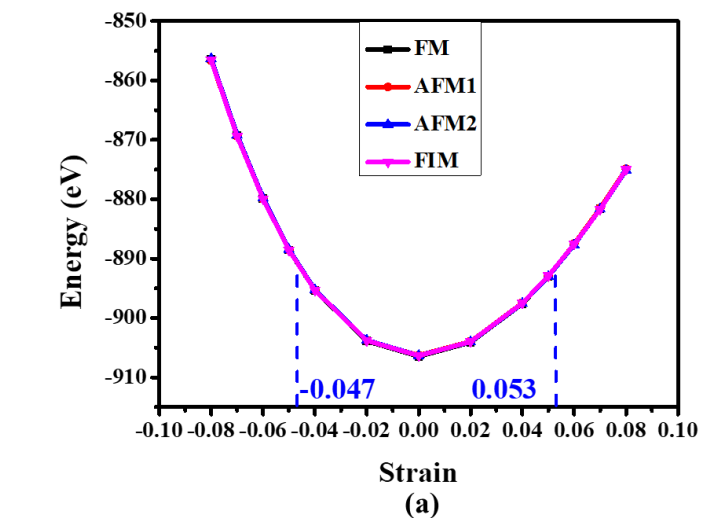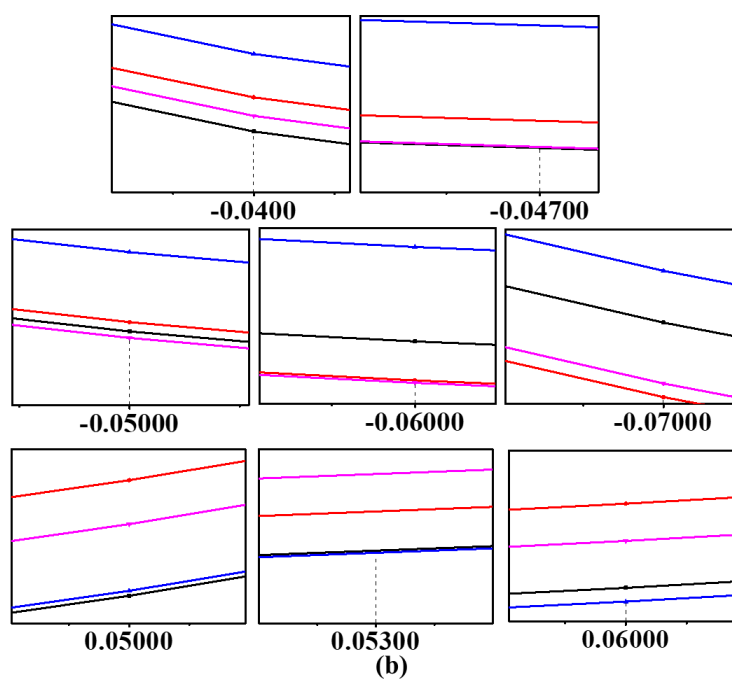

**Figure S3.** The strain-induced energy changes of four magnetic configurations (ferromagnetic (FM), ferromagnetic (FIM) antiferromagnetic (AFM1 and AFM2)) of vanadium porphyrin sheet under biaxial strains (a), and the refined variations of them under the corresponding strains (b). In (b) the red line coincides with the black line under compress strain (-0.047) and the blue line coincides with the black line under tensile strain (0.053).

## 5. The magnetic moment of V, N and C atom in the different biaxial strain

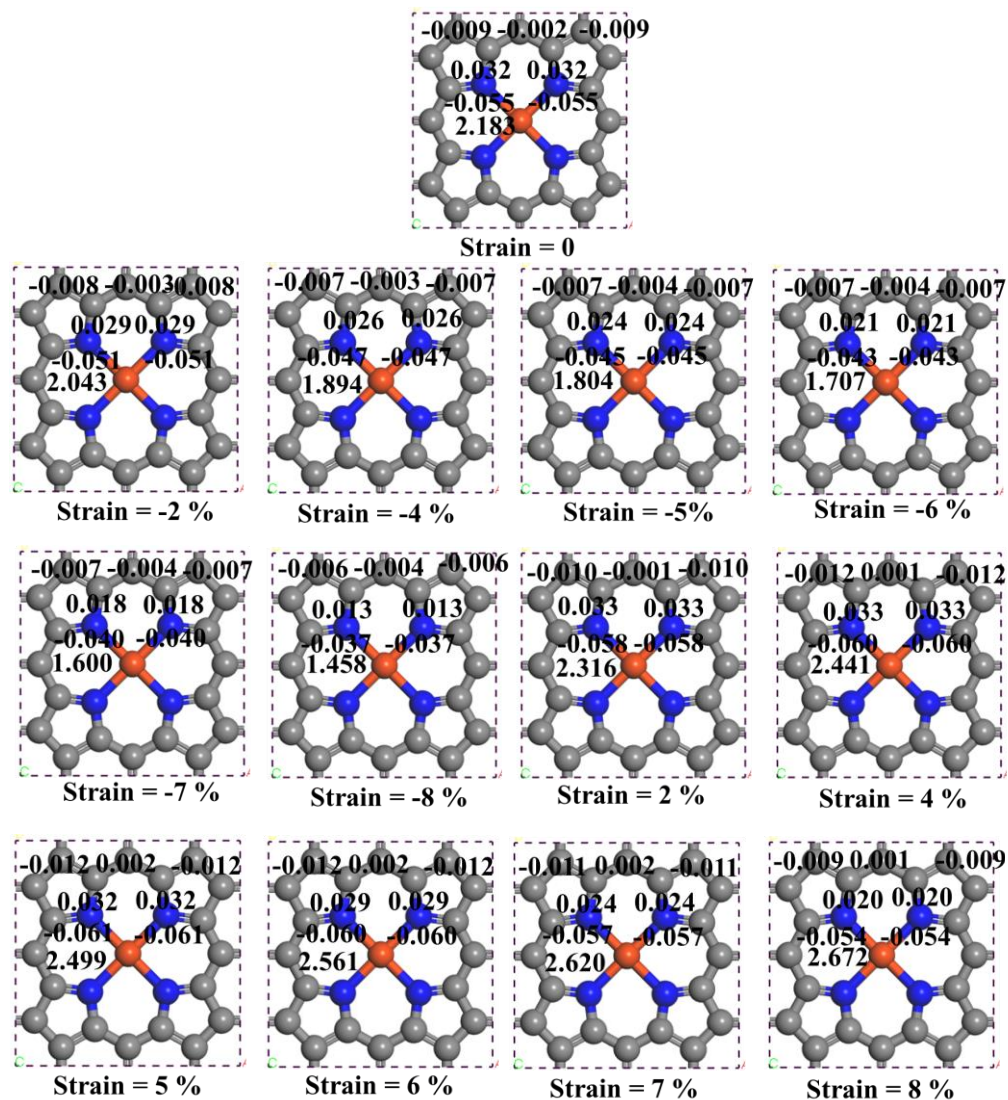

**Figure S4.** The magnetic moment of V, N and C atoms in the different biaxial strain, where a vanadium porphyrin sheet was intercepted from 2×2 supercell (V-PP4) to observe spin magnetic moment.

## 6. Net effective charges on N and V atoms form Bader charge analysis

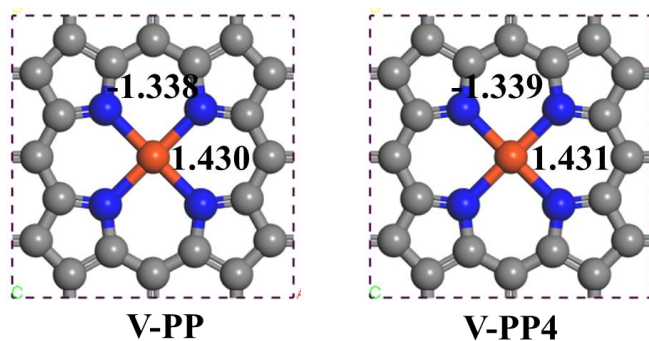

**Figure S5.** Net effective charges on N and V atoms form Bader charge analysis, where the V-PP is the primitive unit cell and the V-PP4 denotes that a vanadium porphyrin sheet was intercepted from  $2 \times 2$  supercell (V-PP4) to observe electron transfer.
